# Supplementary material for: Co-Encapsulation of Curcumin and α-Tocopherol in Bicosome Systems: Physicochemical Properties and Biological Activity
Source: MDPI journal article supplement (doi:10.3390/pharmaceutics15071912), 2023-07-09
Supplement: s1 [file s1]

## *Supplementary Material*

# **Co-encapsulation of curcumin and $\alpha$ -tocopherol in bicosome systems: physicochemical properties and biological activity**

**Daniela Vergara <sup>1,\*</sup>, Olga López <sup>2</sup>, Claudia Sanhueza <sup>1</sup>, Catalina Chávez-Aravena <sup>3</sup>, José Villagra <sup>3</sup>, Mariela Bustamante <sup>4</sup>, Francisca Acevedo <sup>1</sup>**

<sup>1</sup> Center of Excellence in Translational Medicine (CEMT), Faculty of Medicine, and Scientific and Technological Bioresource Nucleus (BIOREN), Universidad de La Frontera, Casilla 54-D, 4780000 Temuco, Chile

<sup>2</sup> Department of Chemical and Surfactant Technology, Institute of Advanced Chemistry of Catalonia (IQAC-CSIC), C/ Jordi Girona 18-26, 08034 Barcelona, Spain

<sup>3</sup> Laboratory of Pharmaceutical and Cosmetic Bioproducts, Center of Excellence in Translational Medicine (CEMT), Department of Preclinical Sciences, Faculty of Medicine, Universidad de La Frontera, Casilla 54-D, 4780000

<sup>4</sup> Temuco, Chile Center of Food Biotechnology and Bioseparations, Scientific and Technological Bioresource Nucleus BIOREN, Universidad de La Frontera, Casilla 54-D, 4780000 Temuco, Chile

\* Correspondence: daniela.vergara@ufrontera.cl (D.V)

**Table S1.** Particle size (nm) and intensity (%) of two peaks for cur/ $\alpha$ -toc-bicosomes (B<sub>A</sub> B<sub>B</sub> and B<sub>C</sub>). Each value represents the mean  $\pm$  standard deviation of at least 3 replicates. Different letters mean statistically significant differences with a p-value < 0.05.

| Bicosome systems | Peak 1                   |                           | Peak 2                    |                           |
|------------------|--------------------------|---------------------------|---------------------------|---------------------------|
|                  | Particle size (nm)       | Intensity (%)             | Particle size (nm)        | Intensity (%)             |
| B <sub>A</sub>   | 94 $\pm$ 7 <sup>a</sup>  | 17 $\pm$ 4 <sup>a,b</sup> | 411 $\pm$ 7 <sup>a</sup>  | 74 $\pm$ 5 <sup>a,b</sup> |
| B <sub>B</sub>   | 67 $\pm$ 11 <sup>a</sup> | 26 $\pm$ 1 <sup>a</sup>   | 327 $\pm$ 6 <sup>b</sup>  | 74 $\pm$ 1 <sup>b</sup>   |
| B <sub>C</sub>   | 43 $\pm$ 3 <sup>b</sup>  | 19 $\pm$ 1 <sup>b</sup>   | 283 $\pm$ 17 <sup>c</sup> | 86 $\pm$ 1 <sup>a</sup>   |

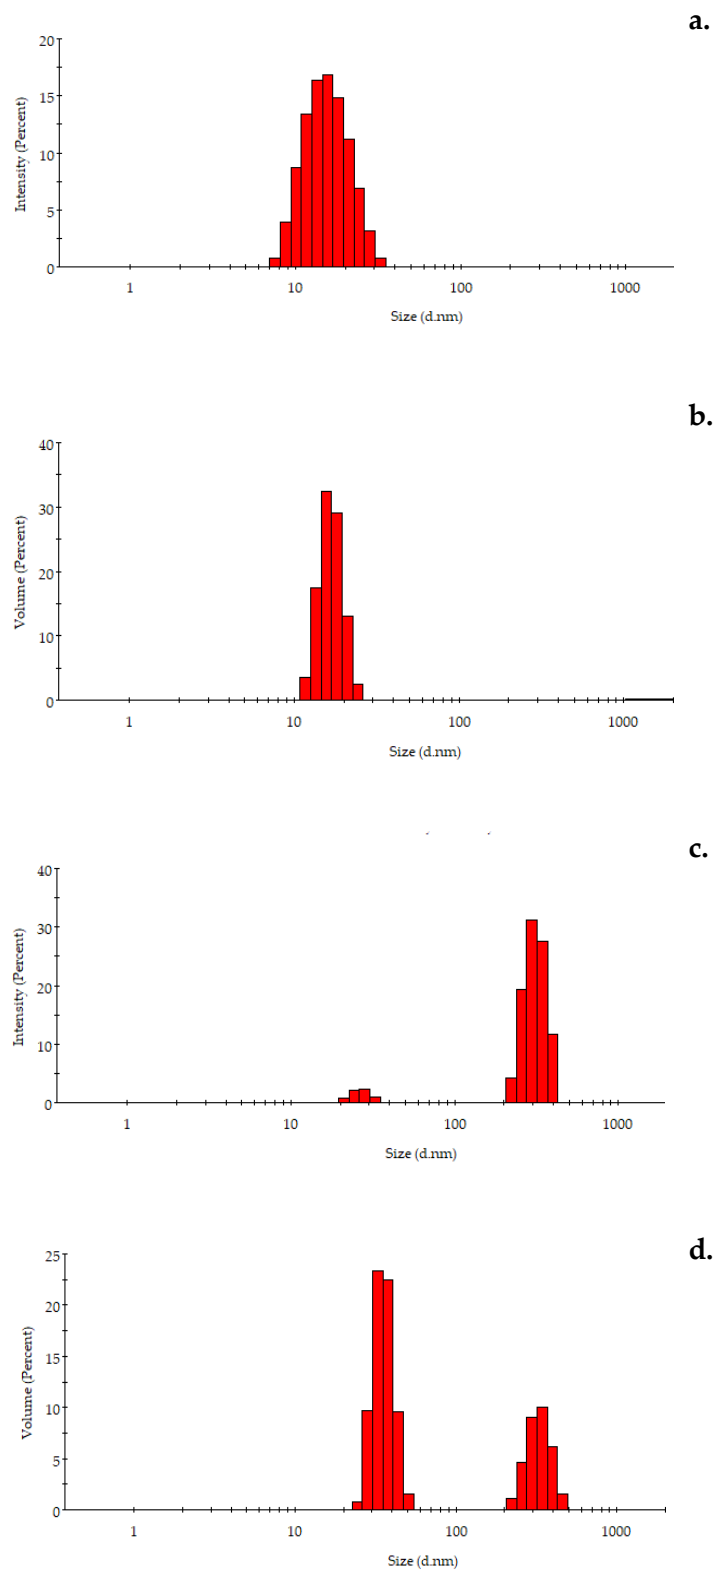

**Figure S1.** Histogram of the particle size distribution (nm). (a) cur/ $\alpha$ -toc-bicelles by intensity (%), (b) cur/ $\alpha$ -toc-bicelles by volume (%), (c) cur/ $\alpha$ -toc-bicosome by intensity (%), and (d) cur/ $\alpha$ -toc-bicosome by volume (%).

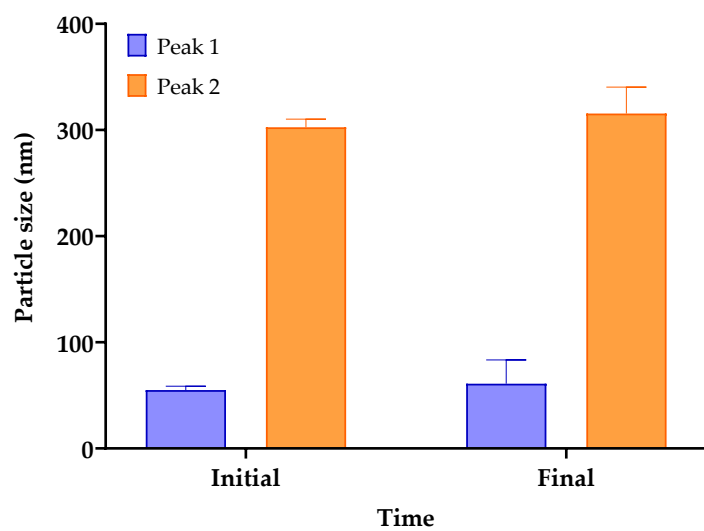

**Figure S2.** Physical stability of cur/α-toc-bicosome Bc formulation determined by particle size (nm) initial and after 90 days storage at 4 °C.
